# Supplementary material for: Association Between Atrial Fibrillation and Long-term Mortality in Acute MI Patients
Source: PubMed Central journal article supplement — Arrhythm Electrophysiol Rev. 2024 Nov 4;13:e17. doi: 10.15420/aer.2024.21 (PMC11577868; doi:10.15420/aer.2024.21), 2024-11-04
Supplement: aer-13-e17-Supp.pdf [file aer-13-e17-Supp.pdf]

## ***Association between Atrial Fibrillation and long-term mortality in acute myocardial infarction patients.***

**Supplementary Table 1. Results of the fully adjusted \*Cox Regression model with coronary death as an end-point.**

| <b>patient characteristics</b>                                     | <b>HR [95% CI]</b> | <b>p-value</b> |
|--------------------------------------------------------------------|--------------------|----------------|
| female gender                                                      | 1.85 [1.21-2.83]   | 0.005          |
| age per year                                                       | 1.05 [1.03-1.07]   | <0.001         |
| BMI 0-24.9 (ref.)                                                  | -                  | -              |
| BMI 25-29.9                                                        | 0.90 [0.56-1.43]   | 0.645          |
| BMI ≥ 30                                                           | 1.19 [0.71-1.99]   | 0.516          |
| no smoking (ref.)                                                  | -                  | -              |
| current smoking                                                    | 2.53 [1.43-4.48]   | 0.002          |
| former smoking                                                     | 2.47 [1.55-3.94]   | <0.001         |
| arterial hypertension                                              | 1.27 [0.71-2.26]   | 0.414          |
| diabetes mellitus                                                  | 1.72 [1.16-2.56]   | 0.007          |
| hyperlipidemia                                                     | 1.06 [0.72-1.56]   | 0.773          |
| left-ventricular EF ≤ 30%                                          | 1.87 [1.05-3.32]   | 0.034          |
| typical chest-pain                                                 | 0.43 [0.28-0.65]   | <0.001         |
| AF                                                                 | 1.16 [0.64-2.09]   | 0.622          |
| <b>revascularisation therapy and hospital discharge medication</b> |                    |                |
| PCI                                                                | 0.54 [0.32-0.92]   | 0.023          |
| bypass surgery                                                     | 0.64 [0.34-1.23]   | 0.183          |
| combination of 4 EBD                                               | 0.56 [0.37-0.85]   | 0.007          |
| <b>laboratory values</b>                                           |                    |                |
| CK-MB 0-150U/L (ref.)                                              | -                  | -              |
| CK-MB 151-300U/L                                                   | 1.44 [0.83-2.52]   | 0.198          |
| CK-MB 301-600U/L                                                   | 0.62 [0.22-1.76]   | 0.369          |
| CK-MB ≥ 601U/L                                                     | 4.77 [1.90-11.97]  | <0.001         |
| CK-MB unknown                                                      | 1.13 [0.65-1.94]   | 0.674          |
| creatinine 0.00-1.00mg/dl (ref.)                                   | -                  | -              |
| creatinine 1.01-1.50mg/dl                                          | 2.02 [1.28-3.17]   | 0.002          |
| creatinine 1.51-2.00mg/dl                                          | 2.97 [1.52-5.79]   | 0.001          |
| creatinine ≥ 2.01                                                  | 3.31 [1.59-6.86]   | 0.001          |

\*adjusted for: sex, age, BMI, type of myocardial infarction (STEMI; NSTEMI, bundle-branch-block), typical chest-pain, left-ventricular EF ≤ 30%, arterial hypertension, diabetes mellitus, smoking status, hyperlipidemia, creatinine level, peak CK-MB level, bypass surgery, PCI, combination of four evidence based drugs for myocardial infarction at hospital discharge (antiplatelet agents, beta-blockers, ACE-inhibitors/AT-II-inhibitors, statins)

**Supplementary Table 2. Results of the Cox regression model for atrial fibrillation compared to sinus rhythm (reference variable) with coronary death as end-point.**

| <b>Cox-Regression model:</b> | <b>unadjusted model</b> | <b>adjusted for sex and age</b> | <b>fully adjusted*</b> |
|------------------------------|-------------------------|---------------------------------|------------------------|
| HR [95% CI]                  | 2.75 [1.60-4.74]        | 1.76 [1.01-3.07]                | 1.16 [0.64-2.09]       |
| <i>p</i> -value              | <0.001                  | 0.046                           | 0.622                  |

**Supplementary Table 3. Results of the fully adjusted \*Cox Regression model with cardiovascular death as an end-point.**

| <b>patient characteristics</b>                                     | <b>HR [95% CI]</b> | <b><i>p</i>-value</b> |
|--------------------------------------------------------------------|--------------------|-----------------------|
| female gender                                                      | 1.67 [1.19-2.35]   | 0.003                 |
| age per year                                                       | 1.06 [1.04-1.09]   | <0.001                |
| BMI 0-24.9 (ref.)                                                  | -                  | -                     |
| BMI 25-29.9                                                        | 0.93 [0.64-1.35]   | 0.700                 |
| BMI ≥ 30                                                           | 1.25 [0.83-1.89]   | 0.286                 |
| no smoking (ref.)                                                  | -                  | -                     |
| current smoking                                                    | 2.31 [1.46-3.64]   | <0.001                |
| former smoking                                                     | 1.99 [1.38-2.87]   | <0.001                |
| arterial hypertension                                              | 1.40 [0.86-2.26]   | 0.174                 |
| diabetes mellitus                                                  | 1.55 [1.13-2.13]   | 0.007                 |
| hyperlipidemia                                                     | 0.89 [0.65-1.21]   | 0.456                 |
| left-ventricular EF ≤ 30%                                          | 2.00 [1.26-3.19]   | 0.003                 |
| typical chest-pain                                                 | 0.46 [0.33-0.66]   | <0.001                |
| AF                                                                 | 1.68 [1.11-2.55]   | 0.015                 |
| <b>revascularisation therapy and hospital discharge medication</b> |                    |                       |
| PCI                                                                | 0.59 [0.39-0.89]   | 0.013                 |
| bypass surgery                                                     | 0.59 [0.34-1.01]   | 0.055                 |
| combination of 4 EBD                                               | 0.61 [0.43-0.86]   | 0.005                 |
| <b>laboratory values</b>                                           |                    |                       |
| CK-MB 0-150U/L (ref.)                                              | -                  | -                     |
| CK-MB 151-300U/L                                                   | 1.39 [0.89-2.17]   | 0.152                 |
| CK-MB 301-600U/L                                                   | 0.80 [0.37-1.70]   | 0.557                 |
| CK-MB ≥ 601U/L                                                     | 3.00 [1.25-7.28]   | 0.014                 |
| CK-MB unknown                                                      | 1.06 [0.69-1.64]   | 0.778                 |
| creatinine 0.00-1.00mg/dl (ref.)                                   | -                  | -                     |
| creatinine 1.01-1.50mg/dl                                          | 1.56 [1.09-2.23]   | 0.014                 |
| creatinine 1.51-2.00mg/dl                                          | 2.56 [1.54-4.26]   | <0.001                |
| creatinine ≥ 2.01                                                  | 2.22 [1.21-4.07]   | 0.010                 |

\*adjusted for: sex, age, BMI, type of myocardial infarction (STEMI; NSTEMI, bundle-branch-block), typical chest-pain, left-ventricular EF ≤ 30%, arterial hypertension, diabetes mellitus, smoking status, hyperlipidemia, creatinine level, peak CK-MB level, bypass surgery, PCI, combination of four evidence based drugs for myocardial infarction at hospital discharge (antiplatelet agents, beta-blockers, ACE-inhibitors/AT-II-inhibitors, statins)

**Supplementary Table 4. Results of the Cox regression model for atrial fibrillation compared to sinus rhythm (reference variable) with cardiovascular death as end-point.**

| <b>Cox-Regression model:</b> | <b>unadjusted model</b> | <b>adjusted for sex and age</b> | <b>fully adjusted*</b> |
|------------------------------|-------------------------|---------------------------------|------------------------|
| HR [95% CI]                  | 4.03 [2.75-5.92]        | 2.43 [1.64-3.61]                | 1.68 [1.11-2.55]       |
| <i>p</i> -value              | <0.001                  | <0.001                          | 0.015                  |

**Supplementary Table 5. Implantation of ICD and or CRT during hospital stay**

| <b>Left Ventricular Ejection Fraction:</b> | <b>&gt;30%</b> | <b>&lt;30%</b> |
|--------------------------------------------|----------------|----------------|
| Patients (N)                               | 2180           | 132            |
| ICD/CRT Implantation                       | 9 (0.4%)       | 7 (5.3%)       |
| <i>p</i> -value                            | -              | <0.001         |

\*For one patient with LVEF>30%, no information was available about ICD/CRT implantation.
